# Supplementary material
Source: PubMed Central journal article supplement (PMC2785372)

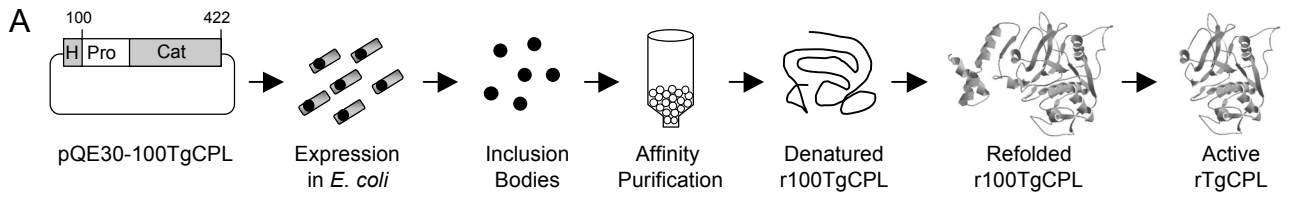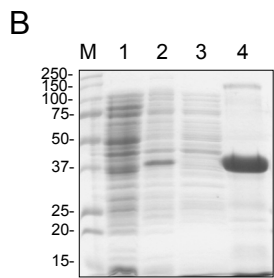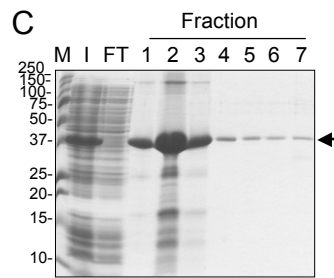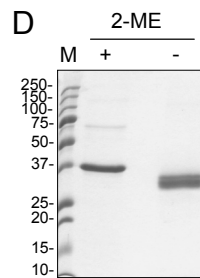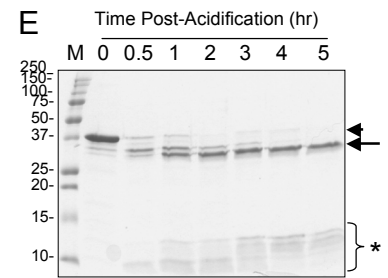

Figure S1.

Supplement: supp_M109.003780_jbc.M109.003780-2.pdf [file supp_M109.003780_jbc.M109.003780-2.pdf]
